# Supplementary material for: Looking for chiral recognition in photoinduced bimolecular electron transfer using ultrafast spectroscopy
Source: Royal Society of Chemistry journal article supplement (doi:10.1039/d3cp00760j), 2023-01-01
Supplement: d3cp00760j1.pdf [file d3cp00760j1.pdf]

# Looking for chiral recognition in photoinduced bimolecular electron transfer using ultrafast spectroscopy

Pragya Verma, Christoph Nançoz, Johann Bosson, Géraldine M. Labrador, Jérôme Lacour, and Eric Vauthey\*

*Department of Physical Chemistry, University of Geneva, 30 Quai Ernest-Ansermet, 1211 Genève  
4, Switzerland*

## Contents

|                                                                            |           |
|----------------------------------------------------------------------------|-----------|
| <b>S1 Samples</b>                                                          | <b>3</b>  |
| <b>S2 Stationary spectroscopy</b>                                          | <b>4</b>  |
| <b>S3 Time-correlated single photon counting</b>                           | <b>5</b>  |
| <b>S4 Femtosecond fluorescence up-conversion</b>                           | <b>6</b>  |
| <b>S5 Electronic transient absorption spectroscopy (TA)</b>                | <b>7</b>  |
| <b>S6 Molecular dynamics simulations and quantum-chemical calculations</b> | <b>10</b> |

## List of Figures

|     |                                                                                                                                                                                                                                                                                                                                                                                                         |    |
|-----|---------------------------------------------------------------------------------------------------------------------------------------------------------------------------------------------------------------------------------------------------------------------------------------------------------------------------------------------------------------------------------------------------------|----|
| S1  | Electron donors tested in this study. . . . .                                                                                                                                                                                                                                                                                                                                                           | 3  |
| S2  | CD and absorption spectra measured with <b>1</b> and <b>2</b> in water (top), and stationary absorption and emission spectra of <b>1</b> in different solvents (bottom). . . . .                                                                                                                                                                                                                        | 4  |
| S3  | TCSPC fluorescence decays measured with <b>1</b> in various solvents and best-fits of the convolution of the instrument response function (grey) with a single exponential function. . . . .                                                                                                                                                                                                            | 5  |
| S4  | Pure quenching dynamics of the fluorescence of the two enantiomers of <b>1</b> with 0.15 M of either BINOL enantiomer in DCM. . . . .                                                                                                                                                                                                                                                                   | 6  |
| S5  | Pure quenching dynamics of the fluorescence of the two enantiomers of <b>1</b> with 0.15 M of either BINOL enantiomer in THF. . . . .                                                                                                                                                                                                                                                                   | 6  |
| S6  | Comparison of the evolution-associated difference spectra (EADS) obtained from the global analysis of the transient-absorption data measured with (–)- <b>1</b> with 50 mM of either D-Trp or L-Trp in 60:40 (v/v) water/ethanol (top) and 90:10 (v/v) water/ACN (bottom). Because of the larger IRF at shorter wavelength, the shape of EADS A below 420 nm should be considered with caution. . . . . | 7  |
| S7  | A) Comparison of the evolution-associated difference spectra obtained from the global analysis of the transient-absorption data measured with (+)- <b>1</b> with 50 mM of either (+)- or (–)-BINOL in ACN. An early transient absorption spectrum recorded with (+)- <b>1</b> alone is also shown. B) Time evolution of the transient absorption at 360 nm (dashed line in panel A). . . . .            | 8  |
| S8  | A) Comparison of the evolution-associated difference spectra obtained from the global analysis of the transient-absorption data measured with (+)- <b>1</b> with 0.15 M of either (+)- or (–)-BINOL in DCM. . . . .                                                                                                                                                                                     | 9  |
| S9  | Histograms of the centre-of-mass AD distance (A) and radial-distribution functions (B) obtained from 50 ns MD trajectories of (–)- <b>1</b> and Trp in water. . . . .                                                                                                                                                                                                                                   | 11 |
| S10 | Frontier molecular orbitals of <b>1</b> , Trp and BINOL calculated at the DFT level (B3LYP/6-31G+d). . . . .                                                                                                                                                                                                                                                                                            | 12 |
| S11 | Histograms of the minimum AD distance obtained from 50 ns MD trajectories of (–)- <b>1</b> and one BINOL molecule in acetonitrile. . . . .                                                                                                                                                                                                                                                              | 13 |
| S12 | Radial-distribution functions obtained from 50 ns MD trajectories of (–)- <b>1</b> and 11 BINOL molecules in acetonitrile. . . . .                                                                                                                                                                                                                                                                      | 14 |
| S13 | Histograms of the centre-of-mass AD distance obtained from 50 ns MD trajectories of (–)- <b>1</b> and one BINOL molecule in THF. . . . .                                                                                                                                                                                                                                                                | 14 |
| S14 | Histograms of the minimum (A) and centre-of-mass distance (B) between (–)- <b>1</b> and $\text{BF}_4^-$ obtained from 50 ns MD trajectories in acetonitrile and THF. . . . .                                                                                                                                                                                                                            | 15 |

## List of Tables

|    |                                                                                                                                                                                                                                                              |   |
|----|--------------------------------------------------------------------------------------------------------------------------------------------------------------------------------------------------------------------------------------------------------------|---|
| S1 | Driving force for photoinduced electron transfer, $-\Delta G_{ET}$ , between the cationic [6]helicenes <b>1</b> and <b>2</b> and the electron donors in polar solvent estimated from the Weller equation with the redox potentials of the reactants. . . . . | 3 |
|----|--------------------------------------------------------------------------------------------------------------------------------------------------------------------------------------------------------------------------------------------------------------|---|

## S1 Samples

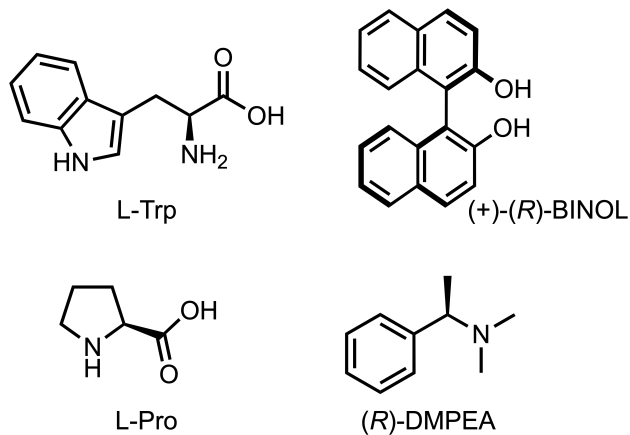

Figure S1: Electron donors tested in this study.

Table S1: Driving force for photoinduced electron transfer,  $-\Delta G_{ET}$ , between the cationic [6]helicenes **1** and **2** and the electron donors in polar solvent estimated from the Weller equation with the redox potentials of the reactants.

| A/D             | $-\Delta G_{ET}$ / eV | $E_{red}(A)$ / V. vs. SCE | $E_{ox}(D)$ / V. vs. SCE |
|-----------------|-----------------------|---------------------------|--------------------------|
| <b>1</b> /TrP   | 0.86                  | -0.52 <sup>a</sup>        | 0.77 <sup>b</sup>        |
| <b>2</b> /TrP   | 0.49                  | -0.85 <sup>a</sup>        | 0.77 <sup>b</sup>        |
| <b>1</b> /BINOL | 0.73                  | -0.52                     | 0.90 <sup>c</sup>        |
| <b>1</b> /Pro   | 0.22                  | -0.52                     | 1.41 <sup>d</sup>        |
| <b>2</b> /Pro   | -0.10                 | -0.85                     | 1.41                     |
| <b>1</b> /DMPEA | 0.89                  | -0.52                     | 0.74 <sup>e</sup>        |
| <b>2</b> /DMPEA | 0.36                  | -0.52                     | 0.74                     |

<sup>a</sup> from ref.1; <sup>b</sup> from ref.2; <sup>c</sup> value for naphthol from ref.3; <sup>d</sup> from ref.4; <sup>e</sup> from ref.5.

## S2 Stationary spectroscopy

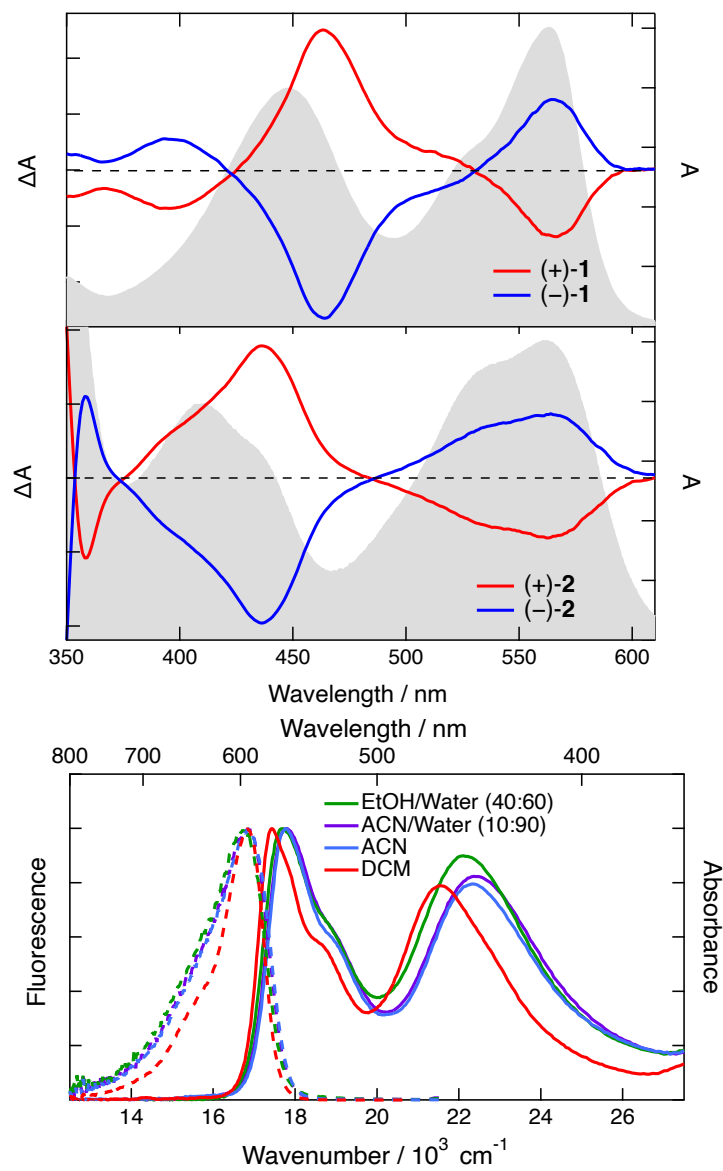

Figure S2: CD and absorption spectra measured with **1** and **2** in water (top), and stationary absorption and emission spectra of **1** in different solvents (bottom).

### S3 Time-correlated single photon counting

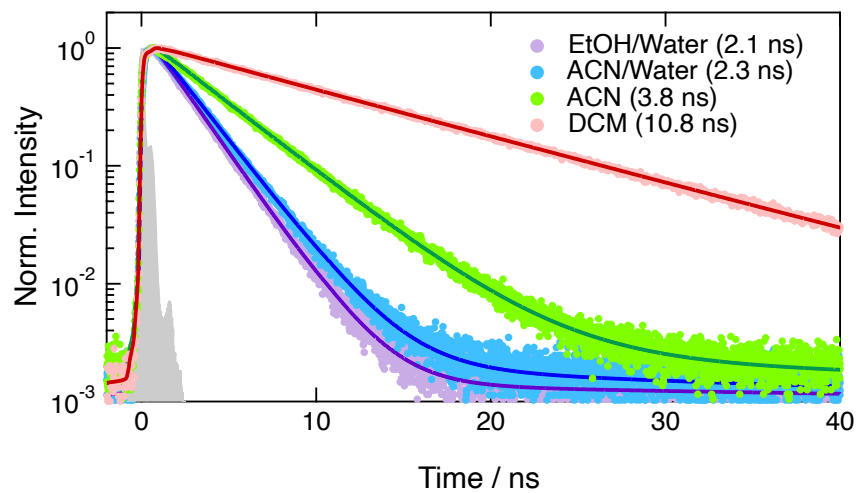

Figure S3: TCSPC fluorescence decays measured with **1** in various solvents and best-fits of the convolution of the instrument response function (grey) with a single exponential function.

## S4 Femtosecond fluorescence up-conversion

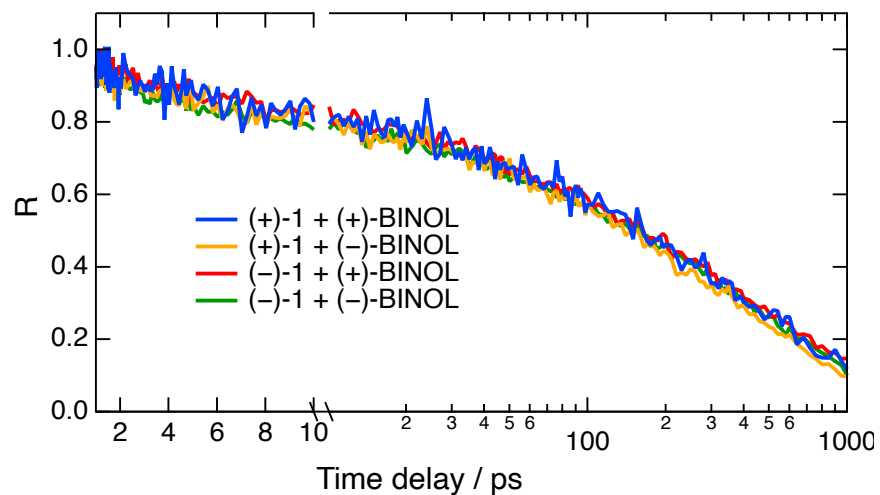

Figure S4: Pure quenching dynamics of the fluorescence of the two enantiomers of **1** with 0.15 M of either BINOL enantiomer in DCM.

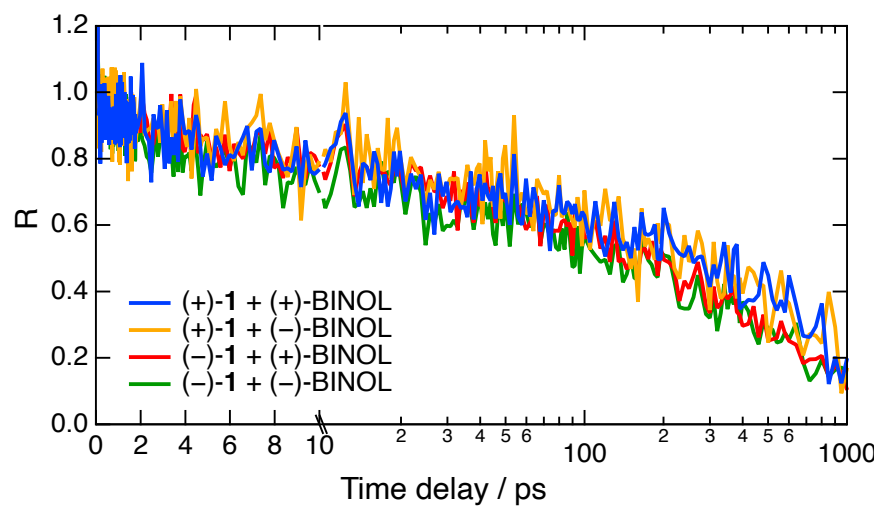

Figure S5: Pure quenching dynamics of the fluorescence of the two enantiomers of **1** with 0.15 M of either BINOL enantiomer in THF.

## S5 Electronic transient absorption spectroscopy (TA)

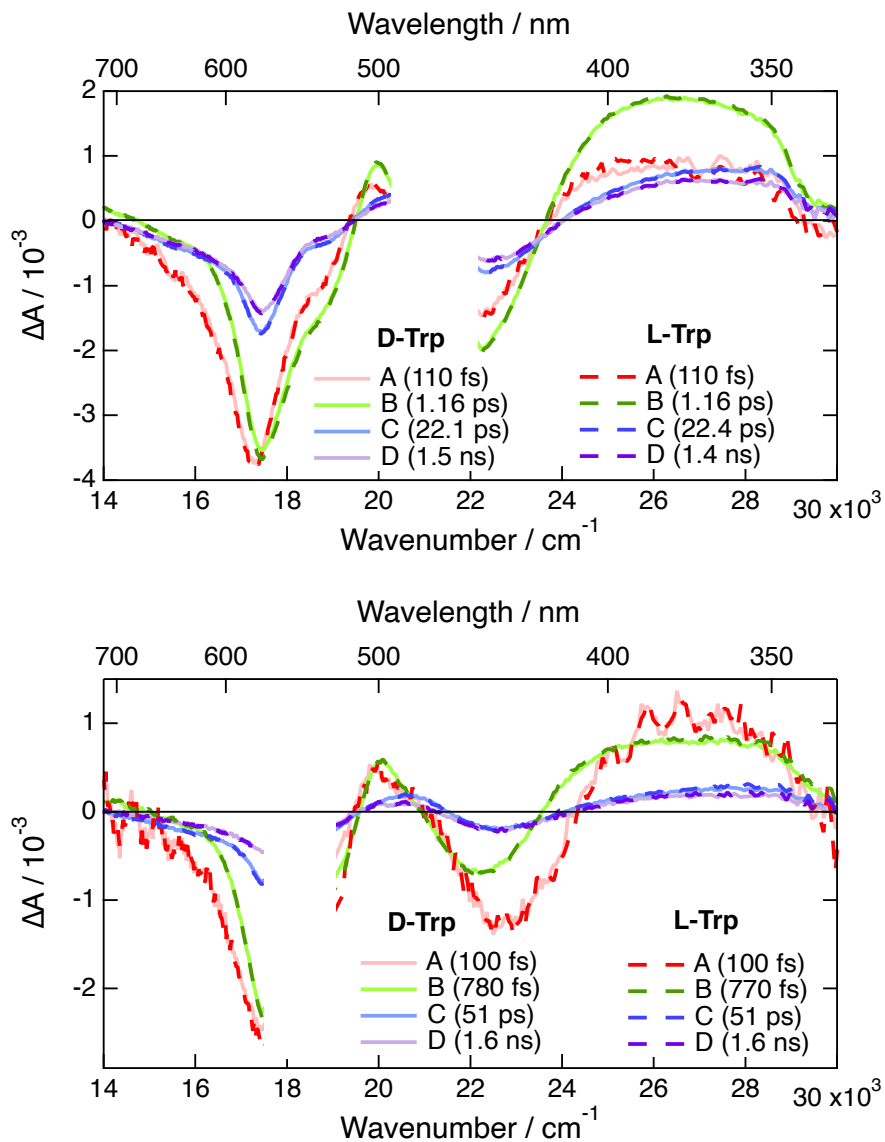

Figure S6: Comparison of the evolution-associated difference spectra (EADS) obtained from the global analysis of the transient-absorption data measured with (–)-1 with 50 mM of either D-Trp or L-Trp in 60:40 (v/v) water/ethanol (top) and 90:10 (v/v) water/ACN (bottom). Because of the larger IRF at shorter wavelength, the shape of EADS A below 420 nm should be considered with caution.

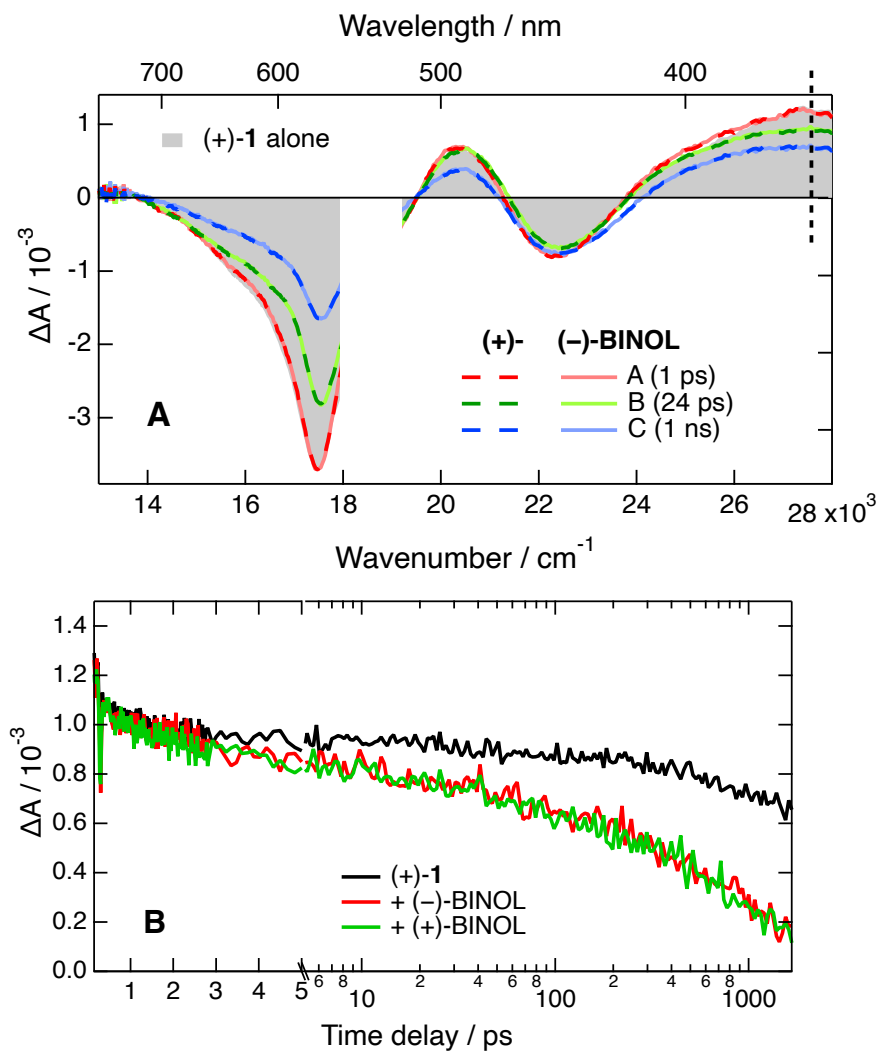

Figure S7: A) Comparison of the evolution-associated difference spectra obtained from the global analysis of the transient-absorption data measured with (+)-**1** with 50 mM of either (+)- or (-)-BINOL in ACN. An early transient absorption spectrum recorded with (+)-**1** alone is also shown. B) Time evolution of the transient absorption at 360 nm (dashed line in panel A).



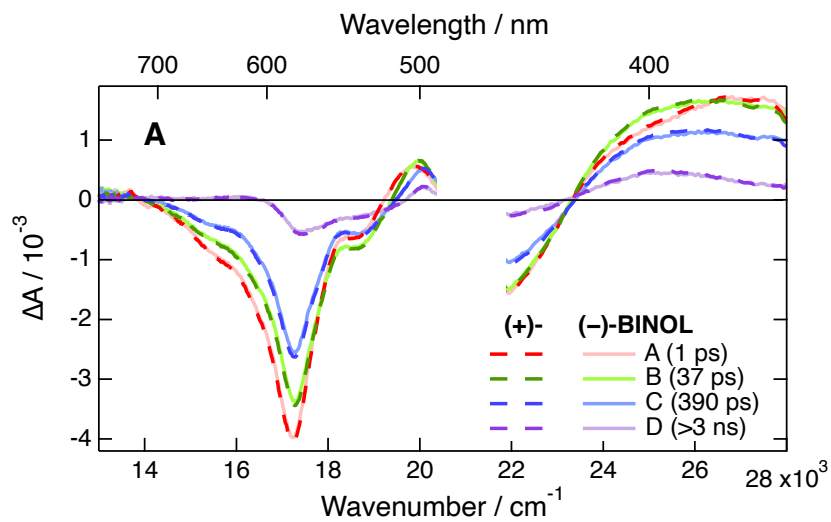

Figure S8: A) Comparison of the evolution-associated difference spectra obtained from the global analysis of the transient-absorption data measured with (+)-**1** with 0.15 M of either (+)- or (-)-BINOL in DCM.

## S6 Molecular dynamics simulations and quantum-chemical calculations

The potential for the dihedral angle of BINOL was described as:

$$V_d(\phi) = k_\phi(1 + \cos(n\phi - \phi_s)). \quad (\text{S1})$$

The parameters were determined by fitting eq.S1 to the potential obtained from relaxed-scan calculations of the energy of BINOL as a function of the dihedral angle,  $\phi$ . The best-fit parameters were:  $k_\phi = 35.89 \text{ kJ/mol}$ ;  $\phi_s = 88.3 \text{ deg.}$  and  $n = 1$ . The force-field parameters for  $\text{BF}_4^-$  were taken from ref.6.

Non-bonded interactions were evaluated with a cutoff of 1.4 nm, and long-range electrostatic interactions were accounted for by the particle mesh Ewald method,[7] with 0.12 nm grid spacing and fourth-order interpolation. A long-range dispersion correction for energy was also included. The LINCS algorithm[8] was used to constrain the bonds of all system components with the exception of water, for which the SETTLE algorithm was applied.[9] The equilibration of the system was ensured by inspecting the total energy drift. The isothermal-isobaric ensemble, NPT, was used for all productions with the v-rescale thermostat at 295 K,[10] and the Parrinello-Rahman barostat at 1 atm using coupling constants of 0.5 ps and 3 ps respectively.[11]

For the simulations of **1** and one Trp, the  $5 \times 5 \times 5 \text{ nm}^3$  box was filled with 4209 water molecules. For the simulations of **1** and 11 BINOL, the box was filled with 1420 molecules of acetonitrile. For the simulations with one BINOL, either 1440 acetonitrile or 924 THF molecules were added.

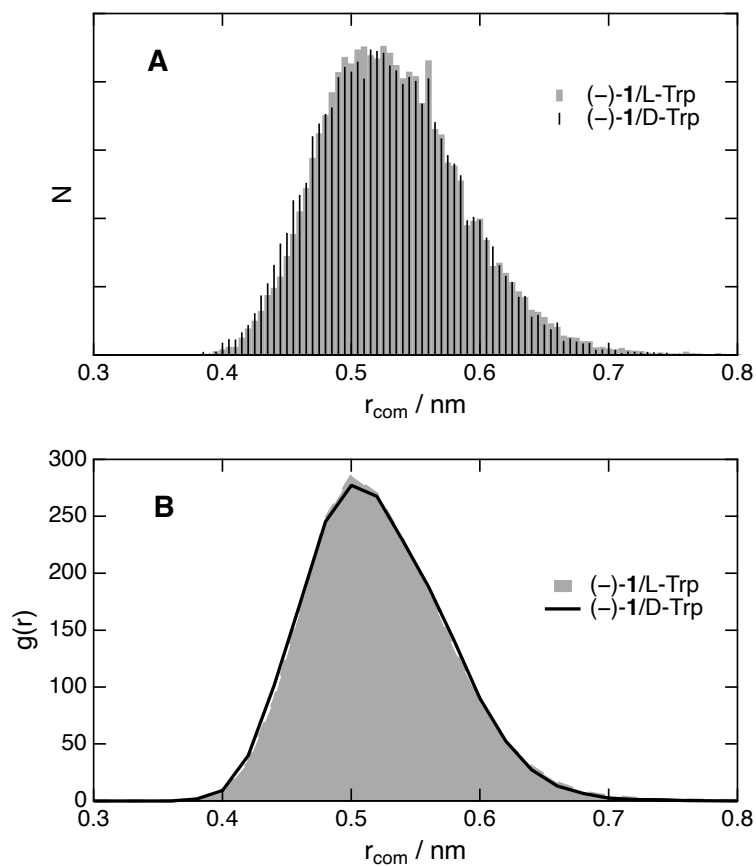

Figure S9: Histograms of the centre-of-mass AD distance (A) and radial-distribution functions (B) obtained from 50 ns MD trajectories of (-)-1 and Trp in water.

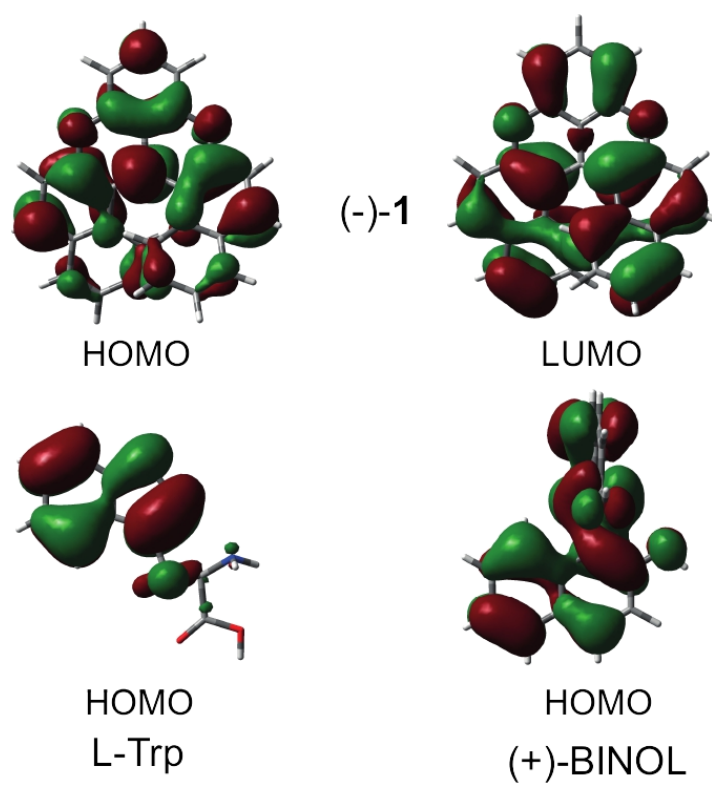

Figure S10: Frontier molecular orbitals of **1**, Trp and BINOL calculated at the DFT level (B3LYP/6-31G+d).

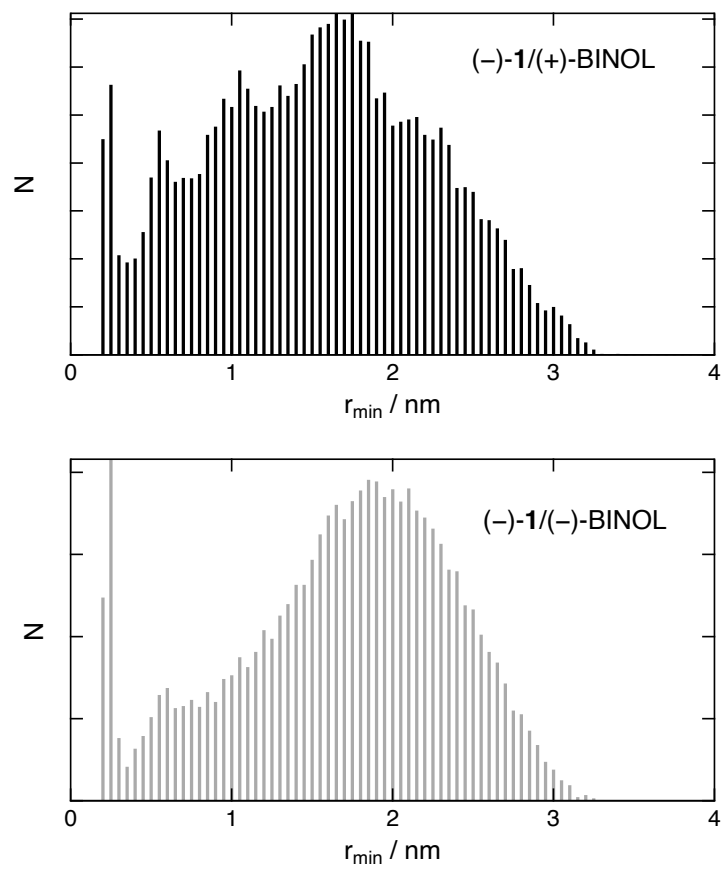

Figure S11: Histograms of the minimum AD distance obtained from 50 ns MD trajectories of **(-)-1** and one BINOL molecule in acetonitrile.

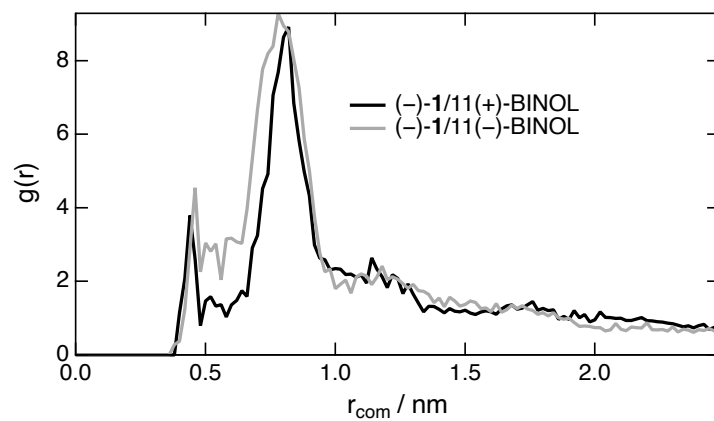

Figure S12: Radial-distribution functions obtained from 50 ns MD trajectories of  $(-)$ -**1** and 11 BINOL molecules in acetonitrile.

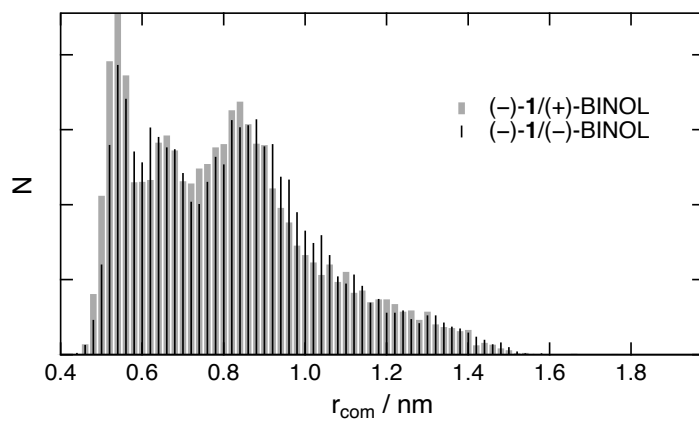

Figure S13: Histograms of the centre-of-mass AD distance obtained from 50 ns MD trajectories of  $(-)$ -**1** and one BINOL molecule in THF.

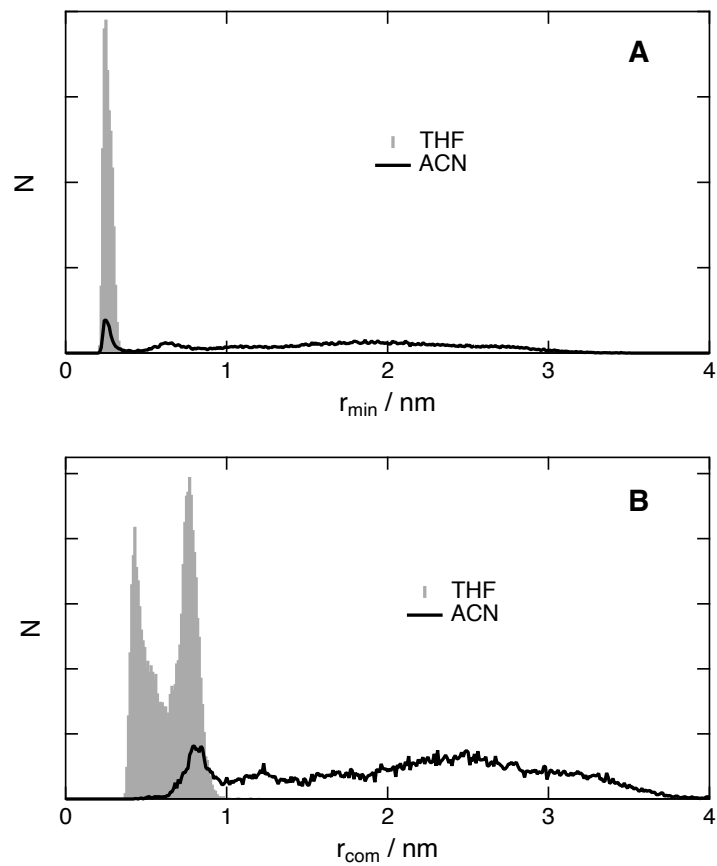

Figure S14: Histograms of the minimum (A) and centre-of-mass distance (B) between  $(-)\text{-1}$  and  $\text{BF}_4^-$  obtained from 50 ns MD trajectories in acetonitrile and THF.

## References

- [1] J. Bosson, G. M. Labrador, S. Pascal, F.-A. Miannay, O. Yushchenko, H. Li, L. Bouffier, N. Sojic, R. C. Tovar, G. Muller, D. Jacquemin, A. D. Laurent, B. Le Guennic, E. Vauthey and J. Lacour, *Chem. Eur. J.*, 2016, **22**, 18394–18403.
- [2] A. Harriman, *J. Phys. Chem.*, 1987, **91**, 6102–6104.
- [3] R. E. Sioda and B. Frankowska, *J. Electroanal. Chem.*, 2004, **568**, 365–370.
- [4] T. Shoji, S. Kim, K. Yamamoto, T. Kawai, Y. Okada and K. Chiba, *Org. Lett.*, 2014, **16**, 6404–6407.
- [5] L. Meites, *Electrochemical Data. Part 1: Organic, Organometallic, and Biochemical Substances*, J. Wiley, 1974.
- [6] B. Doherty, X. Zhong, S. Gathiaka, B. Li and O. Acevedo, *J. Chem. Theory Comput.*, 2017, **13**, 6131–6145.
- [7] T. Darden, D. York and L. Pedersen, *J. Chem. Phys.*, 1993, **98**, 10089–10092.
- [8] B. Hess, H. Bekker, H. J. C. Berendsen and J. G. E. M. Fraaije, *J. Comput. Chem.*, 1997, **18**, 1463–1472.
- [9] S. Miyamoto and P. A. Kollman, *Proteins: Struct., Funct., Genet.*, 1993, **16**, 226–245.
- [10] G. Bussi, T. Zykova-Timan and M. Parrinello, *J. Chem. Phys.*, 2009, **130**, 074101.
- [11] M. Parrinello and A. Rahman, *J. Appl. Phys.*, 1981, **52**, 7182–7190.
